# Supplementary material for: Dynamic Histone H3 Modifications Regulate Meiosis Initiation via Respiration
Source: Front Cell Dev Biol. 2021 Apr 1;9:646214. doi: 10.3389/fcell.2021.646214 (PMC8047140; doi:10.3389/fcell.2021.646214)
Supplement: Supplementary file 6 [file Table_6.XLS]

## Sheet: Concentration
Table S6. Yeast MRM raw data in this study
Concentration of peptides										Concentration of histone modifications
PTM	0h #1	0h #2	4h #1	4h #2	4h #3	12h #1	12h #2	12h #3		PTM	0h #1	0h #2	4h #1	4h #2	4h #3	12h #1	12h #2	12h #3
K9(ac1)K14(ac0)	3.8	4.56	8.51	1.66	6.76	35.7	27.3	18		K9ac	5.47	6.07	10.4	2.334	8.64	51.4	40	24.59
K9(me0)K14(ac1)	12	14.7	24.1	5.74	16.2	112	106	63.6		K9	309	443.7	445.1	94.54	224.2	797	848	594.6
K9(me0)K14(ac0)	297	429	421	88.8	208	685	742	531		K14	300.8	433.56	429.51	90.46	214.76	720.7	769.3	549
K9(ac1)K14(ac1)	1.67	1.51	1.89	0.674	1.88	15.7	12.7	6.59		K14ac	13.67	16.21	25.99	6.414	18.08	127.7	118.7	70.19
K27(ac1)K36(me0)	0.0466	0.0507	0.166	0.079	0.0334	0.0994	0.0776	0.0221		K27ac	0.38464	0.3116	0.7002	0.413	0.30802	0.4074	0.4053	0.2606
K27(ac1)K36(me1)	0.00914	0.0114	0.0282	0	0.00672	0	0	0		K27	8.144	10.086	25.65	8.323	6.335	13.306	11.092	7.259
K27(ac1)K36(me2)	0.0869	0.0515	0.238	0.117	0.0729	0.106	0.0997	0.0435		K36	3.9066	4.7607	13.666	4.009	2.7034	6.8794	5.4176	3.4421
K27(ac1)K36(me3)	0.242	0.198	0.268	0.217	0.195	0.202	0.228	0.195		K36me1	0.37314	0.5274	1.5882	0.413	0.37172	0.896	0.712	0.469
K27(me0)K36(me0)	3.86	4.71	13.5	3.93	2.67	6.78	5.34	3.42		K36me2	1.9569	2.5115	6.848	1.957	1.4229	3.156	2.7797	1.4835
K27(me0)K36(me1)	0.364	0.516	1.56	0.413	0.365	0.896	0.712	0.469		K36me3	2.292	2.598	4.248	2.357	2.145	2.782	2.588	2.125
K27(me0)K36(me2)	1.87	2.46	6.61	1.84	1.35	3.05	2.68	1.44		K79	86.5	109	204	159	96.9	181	142	138
K27(me0)K36(me3)	2.05	2.4	3.98	2.14	1.95	2.58	2.36	1.93		K79me1	1.16	1.27	2.09	2.37	1.05	2.45	2.42	2.2
K79(me0)	86.5	109	204	159	96.9	181	142	138		K79me2	49.4	70.4	71.1	94.5	44.8	116	136	110
K79(me1)	1.16	1.27	2.09	2.37	1.05	2.45	2.42	2.2		K79me3	392	481	508	593	338	1020	1080	807
K79(me2)	49.4	70.4	71.1	94.5	44.8	116	136	110		K4	143	214	294	63.7	134	406	334	300
K79(me3)	392	481	508	593	338	1020	1080	807		K4me1	27.1	46.2	50.8	8.01	28.2	157	158	111
K4(me0)	143	214	294	63.7	134	406	334	300		K4me2	157	198	215	37.6	117	371	403	273
K4(me1)	27.1	46.2	50.8	8.01	28.2	157	158	111		K4me3	163	172	142	32.6	83	152	168	123
K4(me2)	157	198	215	37.6	117	371	403	273		K18	45.76	63.99	119.6	49.7	47.57	69.52	63.14	40.82
K4(me3)	163	172	142	32.6	83	152	168	123		K18ac	0.813	1.01	2.69	0.859	0.589	1.38	1.01	0.719
K18(Ac0)K23(Ac0)	27.7	34.4	81.1	29.4	20.3	44.3	35	23.4		K18me1	0.0736	0.0703	0.161	0.116	0.0581	0.113	0.0994	0.0657
K18(Ac0)K23(Ac1)	6.36	7.29	21.1	6	4.47	9.92	8.84	5.52		K23	28.5866	35.4803	83.951	30.375	20.9471	45.793	36.1094	24.1847
K18(Ac0)K23(Me1)	11.7	22.3	17.4	14.3	22.8	15.3	19.3	11.9		K23ac	6.36	7.29	21.1	6	4.47	9.92	8.84	5.52
K18(Ac1)K23(Ac0)	0.813	1.01	2.69	0.859	0.589	1.38	1.01	0.719		K23me1	11.7	22.3	17.4	14.3	22.8	15.3	19.3	11.9
K18(Ac1)K23(Ac1)	0	0	0	0	0	0	0	0
K18(Ac1)K23(Me1)	0	0	0	0	0	0	0	0
K18(Me1)K23(Ac0)	0.0736	0.0703	0.161	0.116	0.0581	0.113	0.0994	0.0657
K18(Me1)K23(Ac1)	0	0	0	0	0	0	0	0
K18(Me1)K23(Me1)	0	0	0	0	0	0	0	0

## Sheet: Percentage
Percentage of each modification on its site
PTM	0h #1	0h #2	4h #1	4h #2	4h #3	12h #1	12h #2	12h #3
K9ac	0.0173943	0.0134958	0.0228321	0.0240932	0.037107	0.0605846	0.045045	0.0397132
K9	0.982606	0.986504	0.977168	0.975907	0.962893	0.939415	0.954955	0.960287
K14	0.95653	0.963959	0.942942	0.93379	0.92235	0.849481	0.866329	0.886642
K14ac	0.04347	0.0360406	0.0570582	0.0662097	0.0776499	0.150519	0.133671	0.113358
K27ac	0.0450998	0.0299685	0.0265729	0.0472756	0.0463675	0.0297082	0.0352518	0.0346561
K27	0.9549	0.970032	0.973427	0.952724	0.953633	0.970292	0.964748	0.965344
K36	0.458057	0.457865	0.51863	0.458906	0.406953	0.501655	0.471206	0.45775
K36me1	0.0437514	0.0507232	0.0602728	0.0472756	0.0559565	0.0653376	0.0619276	0.0623703
K36me2	0.22945	0.241546	0.259884	0.224016	0.214195	0.23014	0.24177	0.197284
K36me3	0.268742	0.249865	0.161213	0.269803	0.322895	0.202867	0.225096	0.282595
K79	0.163498	0.164735	0.25981	0.187308	0.20156	0.137178	0.10438	0.130533
K79me1	0.00219257	0.00191939	0.00266178	0.00279195	0.00218409	0.00185683	0.00177886	0.00208097
K79me2	0.0933732	0.106397	0.0905513	0.111324	0.0931877	0.0879154	0.0999691	0.104048
K79me3	0.740937	0.726948	0.646977	0.698576	0.703068	0.773049	0.793872	0.763337
K4	0.291777	0.339575	0.418923	0.448876	0.369961	0.373849	0.314205	0.371747
K4me1	0.0552948	0.0733101	0.0723853	0.0564442	0.0778575	0.144567	0.148636	0.137546
K4me2	0.320343	0.314186	0.306355	0.264957	0.323026	0.341621	0.379116	0.33829
K4me3	0.332585	0.272929	0.202337	0.229723	0.229155	0.139963	0.158043	0.152416
K18	0.980993	0.983398	0.976717	0.98076	0.986579	0.978976	0.982733	0.981139
K18ac	0.0174289	0.0155217	0.021968	0.0169512	0.0122156	0.0194331	0.01572	0.0172817
K18me1	0.00157782	0.00108037	0.00131481	0.0022891	0.00120497	0.00159126	0.0015471	0.00157915
K23	0.612834	0.545261	0.685589	0.599408	0.434433	0.644854	0.562019	0.581297
K23ac	0.136344	0.112033	0.172314	0.118402	0.0927057	0.139693	0.137589	0.132677
K23me1	0.250822	0.342706	0.142098	0.28219	0.472861	0.215454	0.300392	0.286025
